# Supplementary material for: Genome-Wide Study of the Defective Sucrose Fermenter Strain of Vibrio cholerae from the Latin American Cholera Epidemic
Source: PubMed Central journal article supplement (PMC3360680; doi:10.1371/journal.pone.0037283), 2012-05-25
Supplement: pone.0037283.s003.pdf [file pone.0037283.s003.pdf]

**Genome-Wide Study of the Defective Sucrose Fermenter Strain of *Vibrio cholerae* from the Latin American Cholera Epidemic**

(Garza DR, Thompson CC, Loureiro ECB, Dutilh BE, Inada DT, et al.)

**Table S1**

**Assembly Statistics of *V. cholerae* Genomes from the European Nucleotide Archive**

| Accession | Strain | Year | Country   | N_reads  | N_contigs | N50_contigs | Longest_contig | Scaffolding_reference | N_scaffolds | N50_scaffolds | Longest_scaffold | Genome_length |
|-----------|--------|------|-----------|----------|-----------|-------------|----------------|-----------------------|-------------|---------------|------------------|---------------|
| ERS013174 | A184   | 1992 | Colombia  | 1833652  | 2952      | 2602        | 14222          | MJ-1236               | 291         | 2980010       | 2980010          | 4165955       |
| ERS013175 | A185   | 1992 | Colombia  | 2072516  | 2534      | 3212        | 16530          | MJ-1236               | 325         | 2972139       | 2972139          | 4191262       |
| ERS013182 | A177   | 1992 | Colombia  | 7167324  | 1855      | 6741        | 39181          | M66-2                 | 685         | 2915601       | 2915601          | 4153428       |
| ERS013183 | A180   | 1992 | Colombia  | 1710970  | 3447      | 2208        | 11680          | MJ-1236               | 334         | 2992124       | 2992124          | 4206204       |
| ERS013184 | A186   | 1992 | Argentina | 2973452  | 3004      | 2657        | 20635          | MJ-1236               | 479         | 2977904       | 2977904          | 4176053       |
| ERS013185 | A193   | 1992 | Bolivia   | 4001314  | 2710      | 3181        | 35999          | MJ-1236               | 574         | 2975112       | 2975112          | 4168318       |
| ERS013186 | A232   | 1991 | Mexico    | 1701326  | 5677      | 1199        | 8413           | M66-2                 | 546         | 2921270       | 2921270          | 4157983       |
| ERS013188 | A200   | 1992 | Argentina | 4238722  | 2722      | 3341        | 37443          | M66-2                 | 719         | 2910734       | 2910734          | 4150422       |
| ERS013189 | A201   | 1992 | Argentina | 2578524  | 3231      | 2302        | 15350          | M66-2                 | 540         | 2892135       | 2892135          | 4117826       |
| ERS013195 | A231   | 1991 | Mexico    | 2693380  | 3222      | 2384        | 12381          | MJ-1236               | 446         | 2981777       | 2981777          | 4173103       |
| ERS013200 | A316   | 1993 | Argentina | 2156650  | 6320      | 1079        | 7141           | MJ-1236               | 623         | 2989262       | 2989262          | 4338837       |
| ERS013251 | A27    | 1991 | Peru      | 6144342  | 700       | 33872       | 108325         | MJ-1236               | 187         | 3018148       | 3018148          | 4269236       |
| ERS013274 | A29    | 1991 | Peru      | 7414754  | 724       | 32731       | 108326         | MJ-1236               | 213         | 3004715       | 3004715          | 4270042       |
| ERS013275 | A31    | 1991 | Peru      | 13285864 | 762       | 25330       | 106346         | MJ-1236               | 202         | 2994622       | 2994622          | 4155495       |
| ERS013276 | A32    | 1991 | Peru      | 8286426  | 724       | 30292       | 108590         | N16961                | 169         | 3009718       | 3009718          | 4234232       |
| ERS013245 | A5     | 1989 | Angola    | 7244590  | 749       | 27905       | 108320         | MJ-1236               | 215         | 2999588       | 2999588          | 4208358       |
