# Supplementary material for: Genome-Wide Study of the Defective Sucrose Fermenter Strain of Vibrio cholerae from the Latin American Cholera Epidemic
Source: PubMed Central journal article supplement (PMC3360680; doi:10.1371/journal.pone.0037283), 2012-05-25
Supplement: pone.0037283.s004.pdf [file pone.0037283.s004.pdf]

# Genome-Wide Study of the Defective Sucrose Fermenter Strain of *Vibrio cholerae* from the Latin American Cholera Epidemic

(Garza DR, Thompson CC, Loureiro ECB, Dutilh BE, Inada DT, et al.)

**Table S2**

| Predicted Protein Functions of Putative Mobile Genomic Regions |                                                                                                                                                                                   |                |
|----------------------------------------------------------------|-----------------------------------------------------------------------------------------------------------------------------------------------------------------------------------|----------------|
| #                                                              | Function                                                                                                                                                                          | Mobile Element |
| 1                                                              | Quaternary ammonium compound-resistance protein SugE                                                                                                                              | GI -1          |
| 2                                                              | COG0840: Methyl-accepting chemotaxis protein                                                                                                                                      | GI -1          |
| 3                                                              | Chemotaxis regulator - transmits chemoreceptor signals to flagellar motor components CheY                                                                                         | GI -1          |
| 4                                                              | FIG01200770: hypothetical protein                                                                                                                                                 | GI -1          |
| 5                                                              | Signal transduction histidine kinase CheA (EC 2.7.3.-)                                                                                                                            | GI -1          |
| 6                                                              | Chemotaxis regulator - transmits chemoreceptor signals to flagellar motor components CheY                                                                                         | GI -1          |
| 7                                                              | Chemotaxis protein methyltransferase CheR (EC 2.1.1.80)                                                                                                                           | GI -1          |
| 8                                                              | FOG: HEAT repeat                                                                                                                                                                  | GI -1          |
| 9                                                              | Chemotaxis response regulator protein-glutamate methyltransferase CheB (EC 3.1.1.61)                                                                                              | GI -1          |
| 10                                                             | Positive regulator of CheA protein activity (CheW)                                                                                                                                | GI -1          |
| 11                                                             | COG0840: Methyl-accepting chemotaxis protein                                                                                                                                      | GI -1          |
| 12                                                             | hypothetical protein                                                                                                                                                              | GI -1          |
| 13                                                             | methyl-accepting chemotaxis protein                                                                                                                                               | GI -1          |
| 14                                                             | Membrane-fusion protein                                                                                                                                                           | GI - 2         |
| 15                                                             | Type I secretion outer membrane protein, TolC precursor                                                                                                                           | GI - 2         |
| 16                                                             | ABC-type antimicrobial peptide transport system, permease component                                                                                                               | GI - 2         |
| 17                                                             | ABC-type antimicrobial peptide transport system, permease component                                                                                                               | GI - 2         |
| 18                                                             | Macrolide export ATP-binding/permease protein MacB (EC 3.6.3.-)                                                                                                                   | GI - 2         |
| 19                                                             | hypothetical protein                                                                                                                                                              | GI - 3         |
| 20                                                             | FIG01201212: hypothetical protein                                                                                                                                                 | GI - 3         |
| 21                                                             | Outer membrane protein/protective antigen OMA87                                                                                                                                   | GI - 3         |
| 22                                                             | corresponds to STY3950 from Accession AL513382: <i>Salmonella typhi</i> CT18                                                                                                      | GI - 3         |
| 23                                                             | Small-conductance mechanosensitive channel                                                                                                                                        | GI - 3         |
| 24                                                             | Paraquat-inducible protein A                                                                                                                                                      | GI - 3         |
| 25                                                             | Aldehyde dehydrogenase (EC 1.2.1.3)                                                                                                                                               | GI - 4         |
| 26                                                             | PTS system, fructose-specific IIA component (EC 2.7.1.69) / PTS system, fructose-specific IIB component (EC 2.7.1.69) / PTS system, fructose-specific IIC component (EC 2.7.1.69) | GI - 4         |
| 27                                                             | PTS system, fructose-specific IIA component (EC 2.7.1.69) / PTS system, fructose-specific IIB component (EC 2.7.1.69) / PTS system, fructose-specific IIC component (EC 2.7.1.69) | GI - 4         |

|    |                                                                          |        |
|----|--------------------------------------------------------------------------|--------|
| 28 | PTS system, fructose-specific IIB component (EC 2.7.1.69)                | GI - 4 |
| 29 | Putative PTS system, nitrogen regulatory IIA component                   | GI - 4 |
| 30 | Transcriptional regulator, AraC family                                   | GI - 4 |
| 31 | GMP reductase (EC 1.7.1.7)                                               | GI - 5 |
| 32 | hypothetical protein                                                     | GI - 5 |
| 33 | DNA-cytosine methyltransferase (EC 2.1.1.37)                             | GI - 5 |
| 34 | FIG01202881: hypothetical protein                                        | GI - 5 |
| 35 | hypothetical protein                                                     | GI - 5 |
| 36 | FIG01200375: hypothetical protein                                        | GI - 5 |
| 37 | IS1004 transposase                                                       | GI - 5 |
| 38 | ATP-dependent RNA helicase RhIE                                          | GI - 5 |
| 39 | Aminomethyltransferase (glycine cleavage system T protein) (EC 2.1.2.10) | GI - 6 |
| 40 | Phage Integrase                                                          | GI - 6 |
| 41 | IS5 transposase                                                          | GI - 6 |
| 42 | hypothetical protein                                                     | GI - 6 |
| 43 | Uropathogenic specific protein                                           | GI - 6 |
| 44 | FIG01203297: hypothetical protein                                        | GI - 6 |
| 45 | hypothetical protein                                                     | GI - 6 |
| 46 | Threonyl-tRNA synthetase (EC 6.1.1.3)                                    | GI - 6 |
| 47 | L-serine dehydratase (EC 4.3.1.17)                                       | GI - 7 |
| 48 | Pantothenate:Na <sup>+</sup> symporter (TC 2.A.21.1.1)                   | GI - 7 |
| 49 | 4-hydroxybenzoate transporter                                            | GI - 7 |
| 50 | FIG01200201: hypothetical protein                                        | GI - 7 |
| 51 | Transcriptional regulator, LacI family                                   | GI - 7 |
| 52 | Nitrate/nitrite response regulator protein                               | GI - 7 |
| 53 | FIG01199690: hypothetical protein                                        | GI - 8 |
| 54 | Putative sodium-glucose/galactose cotransporter                          | GI - 8 |
| 55 | COG0582: Integrase                                                       | GI - 8 |
| 56 | transposase OrfAB, subunit B                                             | GI - 8 |
| 57 | Transposase                                                              | GI - 8 |
| 58 | hypothetical protein                                                     | GI - 8 |

|    |                                                           |                                      |
|----|-----------------------------------------------------------|--------------------------------------|
| 59 | hypothetical protein                                      | GI – 8                               |
| 60 | resolvase, putative                                       | GI – 8                               |
| 61 | RTX toxins and related Ca <sup>2+</sup> -binding proteins | GI – 9                               |
| 62 | Response regulator                                        | GI – 9                               |
| 63 | hypothetical protein                                      | GI – 9                               |
| 64 | Autolysin sensor kinase (EC 2.7.3.-)                      | GI – 9                               |
| 65 | FIG01201672: hypothetical protein                         | GI – 9                               |
| 66 | FIG01201095: hypothetical protein                         | GI – 9                               |
| 67 | Lipoprotein releasing system transmembrane protein LolC   | GI – 9                               |
| 68 | ABC transporter, ATP-binding protein                      | GI – 9                               |
| 69 | FIG01200001: hypothetical protein                         | GI – 9                               |
| 70 | FIG01202943: hypothetical protein                         | GI – 9                               |
| 71 | FIG01201764: hypothetical protein                         | GI – 9                               |
| 72 | Oxidoreductase, aldo/keto reductase family                | GI – 9                               |
| 73 | Choloylglycine hydrolase (EC 3.5.1.24)                    | GI - 10                              |
| 74 | phage integrase                                           | GI – 10                              |
| 75 | FIG01201351: hypothetical protein                         | GI – 10                              |
| 76 | conserved hypothetical protein                            | GI – 10                              |
| 77 | FIG01201312: hypothetical protein                         | GI – 10                              |
| 78 | Non-hemolytic enterotoxin lytic component L1              | GI – 10                              |
| 79 | Non-hemolytic enterotoxin lytic component L1              | GI – 10                              |
| 80 | L-threonine 3-dehydrogenase (EC 1.1.1.103)                | GI – 10                              |
| 81 | hypothetical protein                                      | Latin American epidemic marker phage |
| 82 | Transcriptional Regulator                                 | Latin American epidemic marker phage |
| 83 | P-loop NTPase superfamily                                 | Latin American epidemic marker phage |
| 84 | Possible transcription regulator                          | Latin American epidemic marker phage |
| 85 | Peptidase                                                 | Latin American epidemic marker phage |
| 86 | hypotetical protein                                       | Latin American epidemic marker phage |
| 87 | hypothetical protein                                      | Latin American epidemic marker phage |
| 88 | Radical SAM protein                                       | Latin American epidemic marker phage |
| 89 | Tail assembly protein                                     | Latin American epidemic marker phage |

|     |                                                  |                                      |
|-----|--------------------------------------------------|--------------------------------------|
| 90  | Glycosyl hydrolase                               | Latin American epidemic marker phage |
| 91  | Endopeptidase                                    | Latin American epidemic marker phage |
| 92  | hypotetical protein                              | Latin American epidemic marker phage |
| 93  | hypothetical protein                             | Latin American epidemic marker phage |
| 94  | phage tail tape measure protein                  | Latin American epidemic marker phage |
| 95  | Transcriptional regulator LysR                   | Latin American epidemic marker phage |
| 96  | Phage tail assembly chaperone                    | Latin American epidemic marker phage |
| 97  | Major phage tail protein                         | Latin American epidemic marker phage |
| 98  | Histidine kinase                                 | Latin American epidemic marker phage |
| 99  | Conserved phage protein                          | Latin American epidemic marker phage |
| 100 | Phage head-tail joining protein                  | Latin American epidemic marker phage |
| 101 | Phage head-tail connector protein                | Latin American epidemic marker phage |
| 102 | Major capsid protein                             | Latin American epidemic marker phage |
| 103 | Phage head maturation protease                   | Latin American epidemic marker phage |
| 104 | Portal Protein                                   | Latin American epidemic marker phage |
| 105 | Phage terminase 1 large subunit                  | Latin American epidemic marker phage |
| 106 | Possibly a restriction enzyme                    | Latin American epidemic marker phage |
| 107 | Possibly a serine protease                       | Latin American epidemic marker phage |
| 108 | Nucleoside-specific channel forming protein, Tsx | Latin American epidemic marker phage |
| 109 | Possibly a signaling protein                     | Latin American epidemic marker phage |
| 110 | Phage terminase small subunit                    | Latin American epidemic marker phage |
| 111 | hypothetical protein                             | Latin American epidemic marker phage |
| 112 | hypotetical protein                              | Latin American epidemic marker phage |
| 113 | Antirestriction protein (ArdA)                   | Latin American epidemic marker phage |
| 114 | Bacterial type III secretion protein             | Latin American epidemic marker phage |
| 115 | hypothetical protein                             | Latin American epidemic marker phage |
| 116 | HNH endonuclease                                 | Latin American epidemic marker phage |
| 117 | Possibly mannose-6-phosphate isomerase           | Latin American epidemic marker phage |
| 118 | hypothetical protein CDS                         | Latin American epidemic marker phage |
| 119 | Possibly arginine tRNA ligase                    | Latin American epidemic marker phage |
| 120 | hypothetical protein                             | Latin American epidemic marker phage |

|     |                                                                                    |                                      |
|-----|------------------------------------------------------------------------------------|--------------------------------------|
| 121 | Phage Deoxyribonucleoside kinase                                                   | Latin American epidemic marker phage |
| 122 | Hypothetical protein                                                               | Latin American epidemic marker phage |
| 123 | Phage deoxyribonucleoside kinase                                                   | Latin American epidemic marker phage |
| 124 | hypothetical protein                                                               | Latin American epidemic marker phage |
| 125 | Domain of unknown function                                                         | Latin American epidemic marker phage |
| 126 | Domain of unknown function                                                         | Latin American epidemic marker phage |
| 127 | hypothetical protein CDS                                                           | Latin American epidemic marker phage |
| 128 | Phage exonuclease                                                                  | Latin American epidemic marker phage |
| 129 | terB protein                                                                       | Latin American epidemic marker phage |
| 130 | Phage DNA polymerase                                                               | Latin American epidemic marker phage |
| 131 | Phage primase/helicase                                                             | Latin American epidemic marker phage |
| 132 | Endodesoxyribonucelase                                                             | Latin American epidemic marker phage |
| 133 | Phage ssDNA-binding protein                                                        | Latin American epidemic marker phage |
| 134 | luxR like transcriptional regulator                                                | Latin American epidemic marker phage |
| 135 | parB protein                                                                       | Latin American epidemic marker phage |
| 136 | Phage RNA polymerase                                                               | Latin American epidemic marker phage |
| 137 | T3/T7 like RNA polymerase                                                          | Latin American epidemic marker phage |
| 138 | Possibly a sensor box GGDEF protein                                                | Latin American epidemic marker phage |
| 139 | Phage integrase site-specific recombinase                                          | Latin American epidemic marker phage |
| 140 | FIG01200619: hypothetical protein                                                  | TLC + CTXphi                         |
| 141 | RTX toxin activating lysine-acyltransferase (EC 2.3.1.-)                           | TLC + CTXphi                         |
| 142 | RTX toxins determinant A and related Ca <sup>2+</sup> -binding proteins            | TLC + CTXphi                         |
| 143 | RstC phage-related antirepressor                                                   | TLC + CTXphi                         |
| 144 | RstB phage-related integrase                                                       | TLC + CTXphi                         |
| 145 | RstA phage-related replication protein                                             | TLC + CTXphi                         |
| 146 | RstR phage-related transcriptional repressor                                       | TLC + CTXphi                         |
| 147 | Enterotoxin, B subunit                                                             | TLC + CTXphi                         |
| 148 | Enterotoxin, A subunit (NAD(+)--diphthamide ADP- ribosyltransferase) (EC 2.4.2.36) | TLC + CTXphi                         |
| 149 | Zona occludens toxin                                                               | TLC + CTXphi                         |
| 150 | Accessory cholera enterotoxin                                                      | TLC + CTXphi                         |
| 151 | FIG01201937: hypothetical protein                                                  | TLC + CTXphi                         |

|     |                                                                                             |       |
|-----|---------------------------------------------------------------------------------------------|-------|
| 152 | hypothetical protein                                                                        | VPI-1 |
| 153 | FIG01202538: hypothetical protein                                                           | VPI-1 |
| 154 | hypothetical protein                                                                        | VPI-1 |
| 155 | FIG01199680: hypothetical protein                                                           | VPI-1 |
| 156 | FIG01199680: hypothetical protein                                                           | VPI-1 |
| 157 | Helicase-related protein                                                                    | VPI-1 |
| 158 | Tellurite resistance protein-related protein                                                | VPI-1 |
| 159 | Predicted transcriptional regulator                                                         | VPI-1 |
| 160 | FIG01200656: hypothetical protein                                                           | VPI-1 |
| 161 | hypothetical protein                                                                        | VPI-1 |
| 162 | Transposase                                                                                 | VPI-1 |
| 163 | Transposase                                                                                 | VPI-1 |
| 164 | Transposase                                                                                 | VPI-1 |
| 165 | Aldehyde dehydrogenase (EC 1.2.1.3)                                                         | VPI-1 |
| 166 | hypothetical protein                                                                        | VPI-1 |
| 167 | Lipoprotein, ToxR-activated gene, TagA                                                      | VPI-1 |
| 168 | inner membrane protein, putative                                                            | VPI-1 |
| 169 | hypothetical protein                                                                        | VPI-1 |
| 170 | Thiol peroxidase, Tpx-type (EC 1.11.1.15)                                                   | VPI-1 |
| 171 | Toxin co-regulated pilus biosynthesis protein I, chemoreceptor, negative regulator of TcpA  | VPI-1 |
| 172 | Toxin co-regulated pilus biosynthesis protein P, transcriptional activator of ToxT promoter | VPI-1 |
| 173 | Toxin co-regulated pilus biosynthesis protein H, transcriptional activator of ToxT promoter | VPI-1 |
| 174 | Toxin co-regulated pilin A                                                                  | VPI-1 |
| 175 | Toxin co-regulated pilus biosynthesis protein B                                             | VPI-1 |
| 176 | Toxin co-regulated pilus biosynthesis protein Q                                             | VPI-1 |
| 177 | Toxin co-regulated pilus biosynthesis protein C, outer membrane protein                     | VPI-1 |
| 178 | Toxin co-regulated pilus biosynthesis protein R                                             | VPI-1 |
| 179 | Toxin co-regulated pilus biosynthesis protein D                                             | VPI-1 |
| 180 | Toxin co-regulated pilus biosynthesis protein S                                             | VPI-1 |
| 181 | Toxin co-regulated pilus biosynthesis protein T, putative ATP-binding translocase of TcpA   | VPI-1 |
| 182 | Toxin co-regulated pilus biosynthesis protein E, anchors TcpT to membrane                   | VPI-1 |

|     |                                                                                                     |       |
|-----|-----------------------------------------------------------------------------------------------------|-------|
| 183 | Toxin co-regulated pilus biosynthesis protein F, putative outer membrane channel for TcpA extrusion | VPI-1 |
| 184 | TCP pilus virulence regulatory protein ToxT, transcription activator                                | VPI-1 |
| 185 | TCP pilin signal peptidase, TcpA processing                                                         | VPI-1 |
| 186 | Accessory colonization factor AcfB                                                                  | VPI-1 |
| 187 | Accessory colonization factor AcfC                                                                  | VPI-1 |
| 188 | hypothetical protein                                                                                | VPI-1 |
| 189 | COG0739: Membrane proteins related to metalloendopeptidases                                         | VPI-1 |
| 190 | Accessory colonization factor AcfA                                                                  | VPI-1 |
| 191 | Accessory colonization factor AcfD precursor                                                        | VPI-1 |
| 192 | Phage integrase                                                                                     | VPI-1 |
| 193 | hypothetical protein                                                                                | VPI-1 |
| 194 | Phage integrase                                                                                     | VPI-1 |
| 195 | hypothetical protein                                                                                | VPI-1 |
| 196 | Prophage CP4-57 integrase                                                                           | VPI-1 |
| 197 | tmRNA-binding protein SmpB                                                                          | VPI-1 |
| 198 | Acriflavin resistance protein                                                                       | VPI-2 |
| 199 | tRNA-Ser-GGA                                                                                        | VPI-2 |
| 200 | phage integrase                                                                                     | VPI-2 |
| 201 | Prophage CP4-57 integrase                                                                           | VPI-2 |
| 202 | helicase, putative                                                                                  | VPI-2 |
| 203 | FIG01200559: hypothetical protein                                                                   | VPI-2 |
| 204 | chemotaxis protein MotB-related protein                                                             | VPI-2 |
| 205 | putative membrane protein                                                                           | VPI-2 |
| 206 | Type I restriction-modification system, restriction subunit R (EC 3.1.21.3)                         | VPI-2 |
| 207 | FIG01200742: hypothetical protein                                                                   | VPI-2 |
| 208 | FIG01200429: hypothetical protein                                                                   | VPI-2 |
| 209 | Type I restriction-modification system, specificity subunit S (EC 3.1.21.3)                         | VPI-2 |
| 210 | Type I restriction-modification system, DNA-methyltransferase subunit M (EC 2.1.1.72)               | VPI-2 |
| 211 | FIG01202070: hypothetical protein                                                                   | VPI-2 |
| 212 | FIG01201906: hypothetical protein                                                                   | VPI-2 |

|     |                                                                                                  |       |
|-----|--------------------------------------------------------------------------------------------------|-------|
| 213 | FIG01201150: hypothetical protein                                                                | VPI-2 |
| 214 | Sialic acid-induced transmembrane protein YjhT(NanM), possible mutarotase                        | VPI-2 |
| 215 | Sialic acid-induced transmembrane protein YjhT(NanM), possible mutarotase                        | VPI-2 |
| 216 | Sialic acid utilization regulator, RpiR family                                                   | VPI-2 |
| 217 | N-acetylneuraminate lyase (EC 4.1.3.3)                                                           | VPI-2 |
| 218 | TRAP-type transport system, large permease component, predicted N-acetylneuraminate transporter  | VPI-2 |
| 219 | TRAP-type transport system, small permease component, predicted N-acetylneuraminate transporter  | VPI-2 |
| 220 | TRAP-type transport system, periplasmic component, predicted N-acetylneuraminate-binding protein | VPI-2 |
| 221 | N-acetylmannosamine-6-phosphate 2-epimerase (EC 5.1.3.9)                                         | VPI-2 |
| 222 | N-acetylmannosamine kinase (EC 2.7.1.60)                                                         | VPI-2 |
| 223 | N-acetylglucosamine-6-phosphate deacetylase (EC 3.5.1.25)                                        | VPI-2 |
| 224 | Sialidase (EC 3.2.1.18)                                                                          | VPI-2 |
| 225 | Predicted transcriptional regulator                                                              | VPI-2 |
| 226 | DNA repair protein RadC                                                                          | VPI-2 |
| 227 | FIG01201713: hypothetical protein                                                                | VPI-2 |
| 228 | FIG01203000: hypothetical protein                                                                | VPI-2 |
| 229 | transposase OrfAB, subunit B                                                                     | VPI-2 |
| 230 | Transposase                                                                                      | VPI-2 |
| 231 | Mu-like prophage FluMu protein gp42                                                              | VPI-2 |
| 232 | hypothetical protein                                                                             | VPI-2 |
| 233 | Mu-like prophage FluMu protein gp41                                                              | VPI-2 |
| 234 | FIG01199767: hypothetical protein                                                                | VPI-2 |
| 235 | FIG01202257: hypothetical protein                                                                | VPI-2 |
| 236 | transcriptional regulator, putative                                                              | VPI-2 |
| 237 | hypothetical protein                                                                             | VPI-2 |
| 238 | hypothetical protein                                                                             | VPI-2 |
| 239 | FIG01200588: hypothetical protein                                                                | VPI-2 |
| 240 | General secretion pathway protein A                                                              | VPI-2 |
| 241 | hypothetical protein                                                                             | VPI-2 |



|     |                                      |          |
|-----|--------------------------------------|----------|
| 242 | FIG01200781: hypothetical protein    | VPI-2    |
| 243 | FIG01205904: hypothetical protein    | VPI-2    |
| 244 | FIG01200234: hypothetical protein    | VPI-2    |
| 245 | hypothetical protein                 | VPI-2    |
| 246 | conserved hypothetical protein       | VPI-2    |
| 247 | FIG01201713: hypothetical protein    | VPI-2    |
| 248 | FIG01201770: hypothetical protein    | VPI-2    |
| 249 | FIG01200074: hypothetical protein    | VPI-2    |
| 250 | hypothetical protein                 | VPI-2    |
| 251 | FIG01202565: hypothetical protein    | VPI-2    |
| 252 | FIG01201490: hypothetical protein    | VPI-2    |
| 253 | Transcriptional regulator, AlpA like | VPI-2    |
| 254 | FIG01200010: hypothetical protein    | VPI-2    |
| 255 | FIG01203377: hypothetical protein    | VSP - I  |
| 256 | hypothetical protein                 | VSP - I  |
| 257 | Putative transcriptional regulator   | VSP - I  |
| 258 | Response regulator                   | VSP - I  |
| 259 | hypothetical protein                 | VSP - I  |
| 260 | patatin-related protein              | VSP - I  |
| 261 | FIG01202724: hypothetical protein    | VSP - I  |
| 262 | FIG01200176: hypothetical protein    | VSP - I  |
| 263 | FIG01200099: hypothetical protein    | VSP - I  |
| 264 | Phage Integrase                      | VSP - I  |
| 265 | FIG01202926: hypothetical protein    | VSP - I  |
| 266 | transposase, putative                | VSP - I  |
| 267 | Glutathione reductase (EC 1.8.1.7)   | VSP - I  |
| 268 | hypothetical protein                 | VSP - I  |
| 269 | hypothetical protein                 | VSP - I  |
| 270 | Putative hemolysin                   | VSP - II |
| 271 | hypothetical protein                 | VSP - II |
| 272 | hypothetical protein                 | VSP - II |

|     |                                                         |          |
|-----|---------------------------------------------------------|----------|
| 273 | hypothetical protein                                    | VSP – II |
| 274 | FIG01202833: hypothetical protein                       | VSP – II |
| 275 | FIG01202149: hypothetical protein                       | VSP – II |
| 276 | FIG01199737: hypothetical protein                       | VSP – II |
| 277 | FIG01199737: hypothetical protein                       | VSP – II |
| 278 | FIG01203010: hypothetical protein                       | VSP – II |
| 279 | predicted transcriptional regulator                     | VSP – II |
| 280 | Ribonuclease HI, Vibrio paralog                         | VSP – II |
| 281 | transposase OrfAB, subunit B                            | VSP – II |
| 282 | Transposase                                             | VSP – II |
| 283 | transposase OrfAB, subunit A                            | VSP – II |
| 284 | Transposase                                             | VSP – II |
| 285 | methylation site containing protein                     | VSP – II |
| 286 | high-affinity zinc uptake system protein ZnuA precursor | VSP – II |
| 287 | Cell wall endopeptidase, family M23/M37                 | VSP – II |
| 288 | FIG01201073: hypothetical protein                       | VSP – II |
| 289 | FIG01199973: hypothetical protein                       | VSP – II |
| 290 | FIG01200607: hypothetical protein                       | VSP – II |
| 291 | FIG01202639: hypothetical protein                       | VSP – II |
| 292 | FIG01200390: hypothetical protein                       | VSP – II |
| 293 | FIG01201167: hypothetical protein                       | VSP – II |
| 294 | DNA repair protein RadC                                 | VSP – II |
| 295 | FIG00938826: hypothetical protein                       | VSP – II |
| 296 | hypothetical protein                                    | VSP – II |
| 297 | FIG00828579: hypothetical protein                       | VSP – II |
| 298 | Transposase                                             | VSP – II |
| 299 | transposase OrfAB, subunit B                            | VSP – II |
| 300 | Prophage CP4-57 integrase                               | VSP – II |
| 301 | hypothetical protein                                    | VSP – II |
| 302 | tRNA-Met-CAT                                            | VSP – II |
| 303 | RNA polymerase sigma factor RpoD                        | VSP – II |

|     |                                                                                                                                            |                    |
|-----|--------------------------------------------------------------------------------------------------------------------------------------------|--------------------|
| 304 | Phosphomannomutase (EC 5.4.2.8)                                                                                                            | O1 Antigen cluster |
| 305 | GDP-mannose 4,6-dehydratase (EC 4.2.1.47)                                                                                                  | O1 Antigen cluster |
| 306 | Bacillosamine/Legionaminic acid biosynthesis aminotransferase PglE; 4-keto-6-deoxy-N-Acetyl-D-hexosaminyl-(Lipid carrier) aminotransferase | O1 Antigen cluster |
| 307 | O-antigen export system, polymerase or transferase                                                                                         | O1 Antigen cluster |
| 308 | O-antigen export system, permease protein                                                                                                  | O1 Antigen cluster |
| 309 | Methionine ABC transporter ATP-binding protein                                                                                             | O1 Antigen cluster |
| 310 | acyl carrier protein, putative                                                                                                             | O1 Antigen cluster |
| 311 | Long-chain-fatty-acid--CoA ligase (EC 6.2.1.3)                                                                                             | O1 Antigen cluster |
| 312 | Alcohol dehydrogenase (EC 1.1.1.1); Acetaldehyde dehydrogenase (EC 1.2.1.10)                                                               | O1 Antigen cluster |
| 313 | acyl protein synthase/acyl-CoA reductase RfbN                                                                                              | O1 Antigen cluster |
| 314 | acetyltransferase RfbO, CysE/LacA/LpxA/NodL family                                                                                         | O1 Antigen cluster |
| 315 | RfbT protein                                                                                                                               | O1 Antigen cluster |
| 316 | Transposase                                                                                                                                | O1 Antigen cluster |
| 317 | transposase OrfAB, subunit B                                                                                                               | O1 Antigen cluster |
| 318 | RfbT protein                                                                                                                               | O1 Antigen cluster |
| 319 | Glycosyltransferase                                                                                                                        | O1 Antigen cluster |
| 320 | Nucleoside-diphosphate sugar epimerase/dehydratase                                                                                         | O1 Antigen cluster |
| 321 | hypothetical protein                                                                                                                       | O1 Antigen cluster |
| 322 | UDP-glucose 4-epimerase (EC 5.1.3.2)                                                                                                       | O1 Antigen cluster |
| 323 | Lipid carrier : UDP-N-acetylgalactosaminyltransferase (EC 2.4.1.-)                                                                         | O1 Antigen cluster |
| 324 | FIG01201221: hypothetical protein                                                                                                          | O1 Antigen cluster |
| 325 | Metallo-beta-lactamase family protein, RNA-specific                                                                                        | O1 Antigen cluster |
| 326 | Small-conductance mechanosensitive channel                                                                                                 | O1 Antigen cluster |
| 327 | Hypothetical protein VC0266 (sugar utilization related?)                                                                                   | O1 Antigen cluster |
| 328 | D-3-phosphoglycerate dehydrogenase (EC 1.1.1.95)                                                                                           | O1 Antigen cluster |
| 329 | FIG01200173: hypothetical protein                                                                                                          | O1 Antigen cluster |
| 330 | Mannose-6-phosphate isomerase (EC 5.3.1.8)                                                                                                 | O1 Antigen cluster |
| 331 | ROK family Glucokinase with ambiguous substrate specificity                                                                                | O1 Antigen cluster |
| 332 | COG1253: Hemolysins and related proteins containing CBS domains                                                                            | O1 Antigen cluster |
