# Supplementary material for: Genome-Wide Study of the Defective Sucrose Fermenter Strain of Vibrio cholerae from the Latin American Cholera Epidemic
Source: PLOS journal article supplement (doi:10.1371/journal.pone.0037283), 2012-05-25

Figure S1

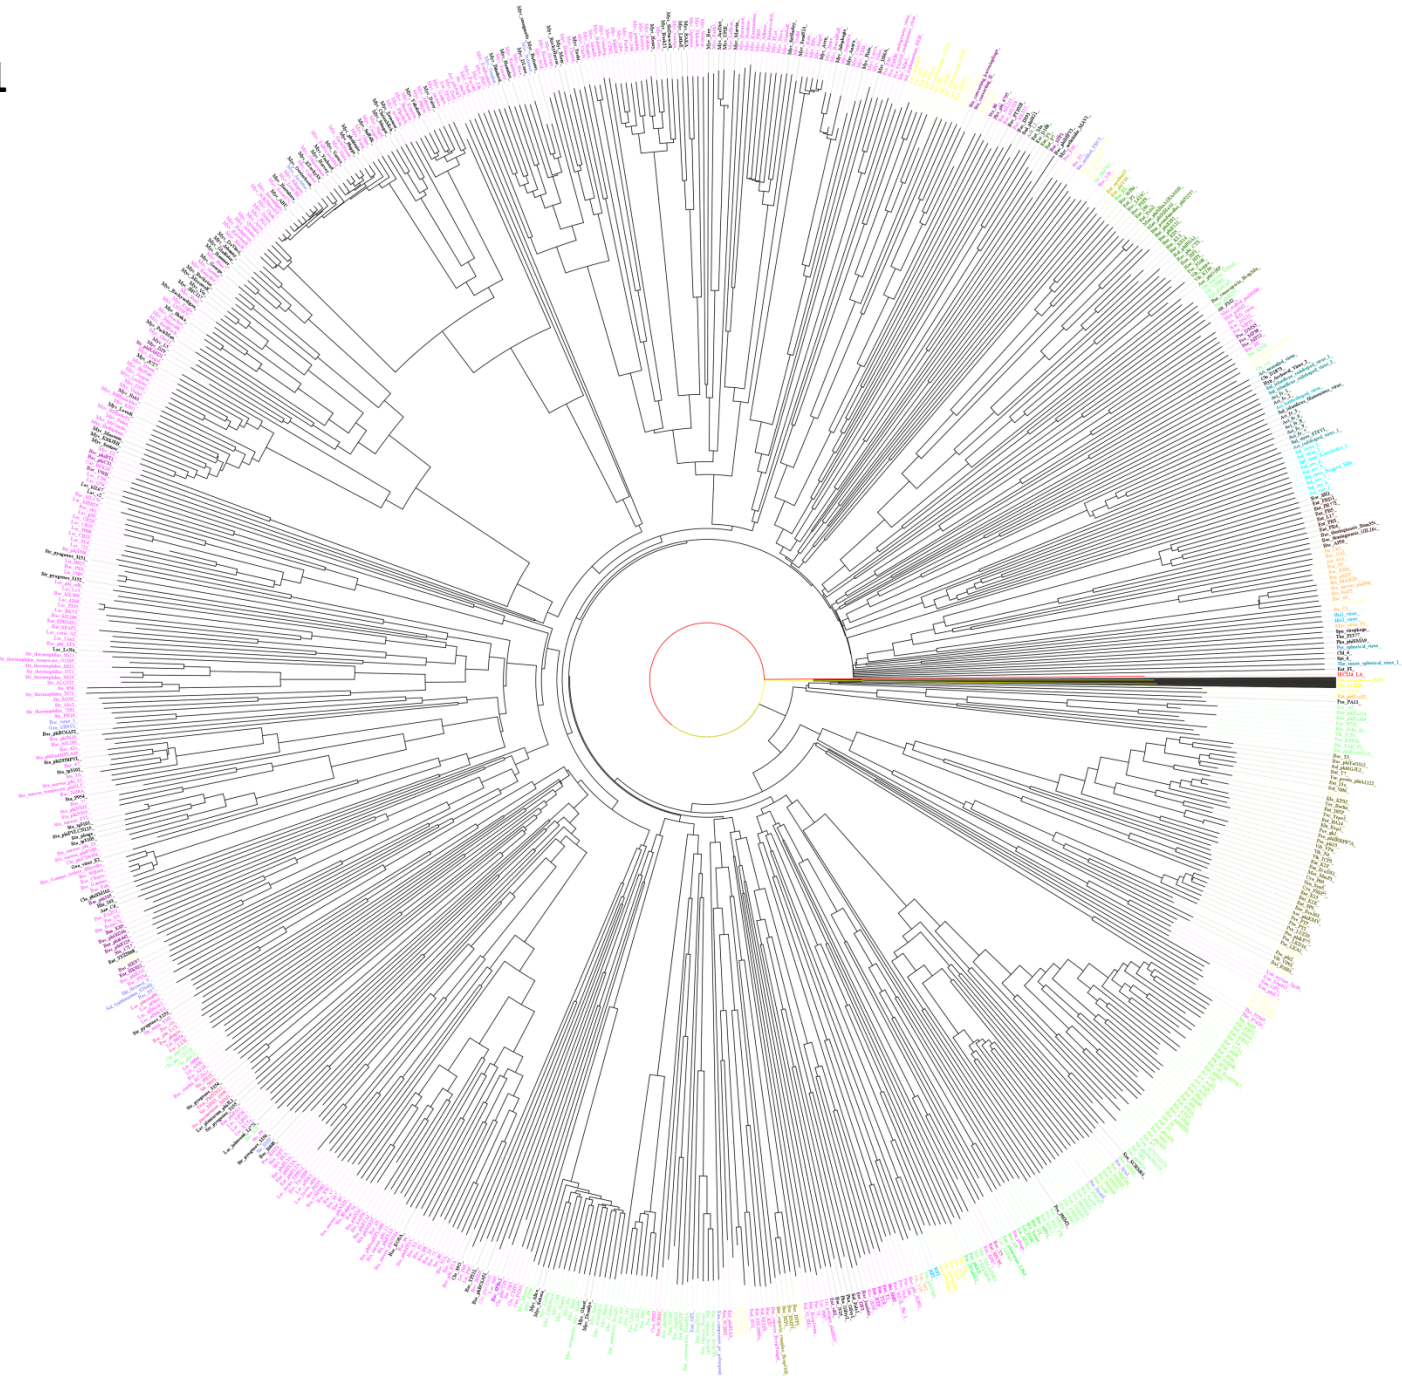

Supplement: S8 (10.1371/journal.pone.0037283.s008) [file journal.pone.0037283.s008]
